# Supplementary material for: Cold Tolerance of ScCBL6 Is Associated with Tonoplast Transporters and Photosynthesis in Arabidopsis
Source: MDPI journal article supplement (doi:10.3390/cimb44110378), 2022-11-10
Supplement: s1 [file s1]

## Additional files

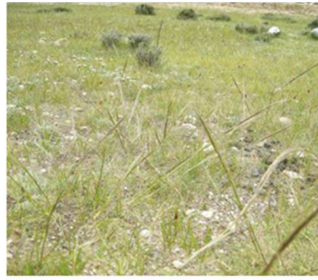

**Figure S1.** Highland distribution of *Stipa capillacea*.

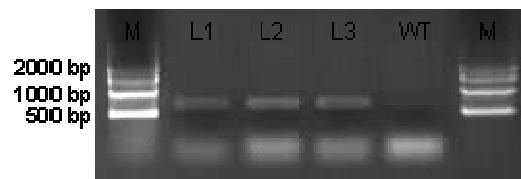

**Figure S2.** Gene-specific PCR identification of transgenic plants

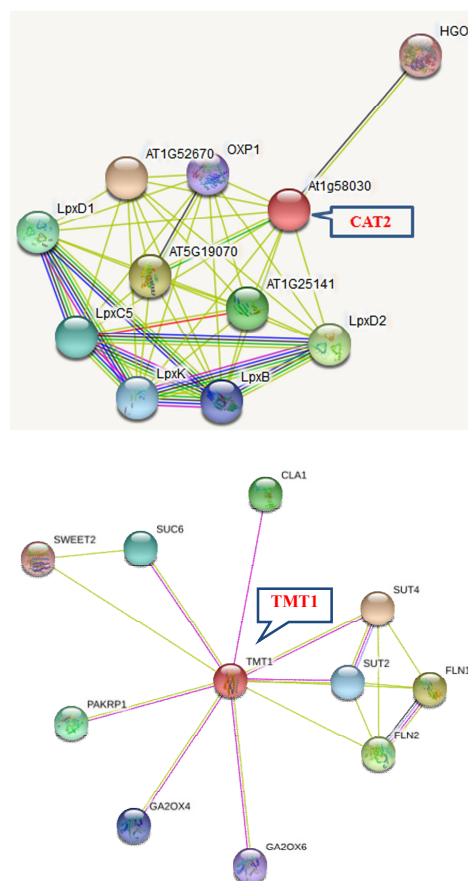

**Figure S3.** Protein interaction networks of CAT2 and TMT1
